# Supplementary material for: Controllable synthesis and morphology evolution from two-dimensions to one-dimension of layered K2V6O16·nH2O
Source: Royal Society of Chemistry journal article supplement (doi:10.1039/c5ce00256g), 2015-01-01
Supplement: c5ce00256g1.pdf [file c5ce00256g1.pdf]

†**Electronic supplementary information (ESI)**  
**for**

**Controllable synthesis and morphology evolution from two-dimension to one-dimension of layered  $K_2V_6O_{16} \cdot nH_2O$  and their photocatalytic properties**

Xingang Kong<sup>a\*</sup>, Zhanglin Guo<sup>a</sup>, Puhong Wen<sup>b</sup>, Jianfeng Huang<sup>a</sup>, Liyun Cao<sup>a</sup>, Lixiong Yin<sup>a</sup>, Jiayin Li<sup>a</sup>,  
Qi Feng<sup>c</sup>

<sup>a</sup> School of Materials Science and Engineering, Shaanxi University of Science and Technology,  
Weiyang, Xi'an, Shaanxi 710021, PR China

<sup>b</sup> Department of Chemistry and Chemical Engineering, Baoji University of Arts and Science, 1 Gaoxin  
Road, Baoji, Shaanxi 721013, PR China

<sup>c</sup> Department of Advanced Materials Science, Faculty of Engineering, Kagawa University, 2217-20  
Hayashi-cho, Takamatsu-shi, 761-0396 Japan

† Electronic supplementary information (ESI) available.

---

\* Corresponding author: Tel./fax: +86 029 86168802.  
E-mail addresses: yezhu\_1983@163.com (Xingang Kong).

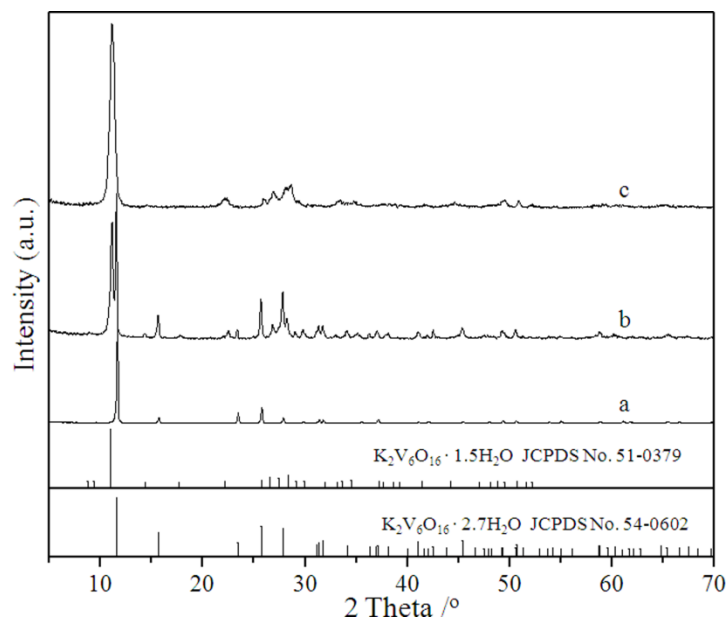

**Fig. S1** XRD patterns of samples obtained at the hydrothermal condition of pH=4 at 180 °C for 3 h(a), 6 h(b), 12 h(c).

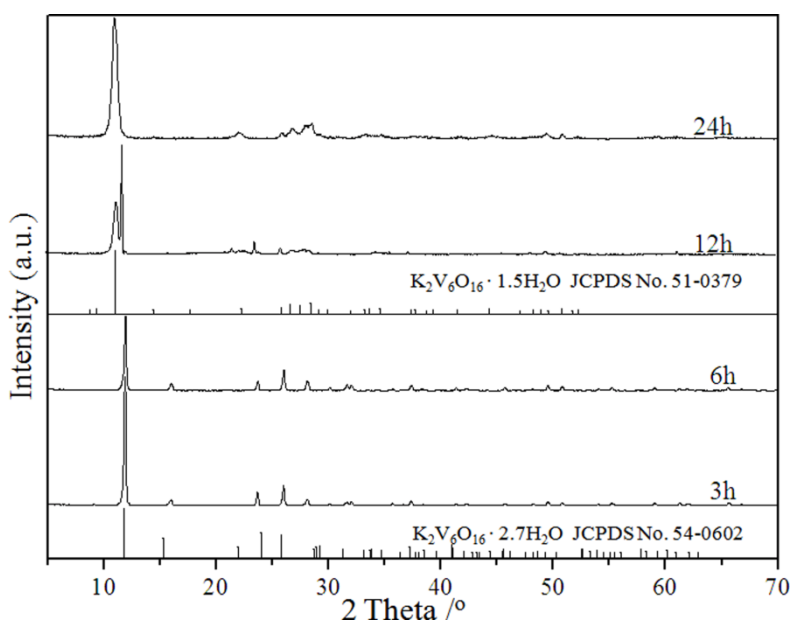

**Fig. S2** XRD patterns of samples obtained at the hydrothermal conditions of 150 °C and pH=6 for different time.

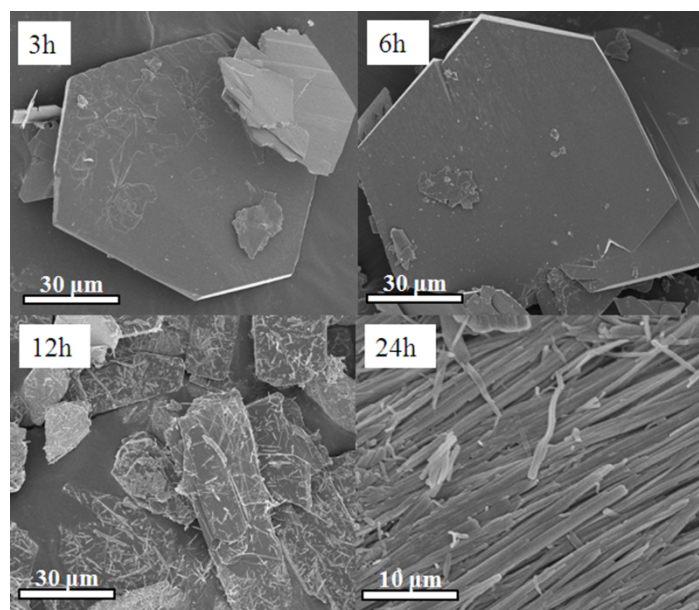

**Fig. S3** FE-SEM images of samples obtained at the hydrothermal condition of 150 °C and pH=6 for different time.

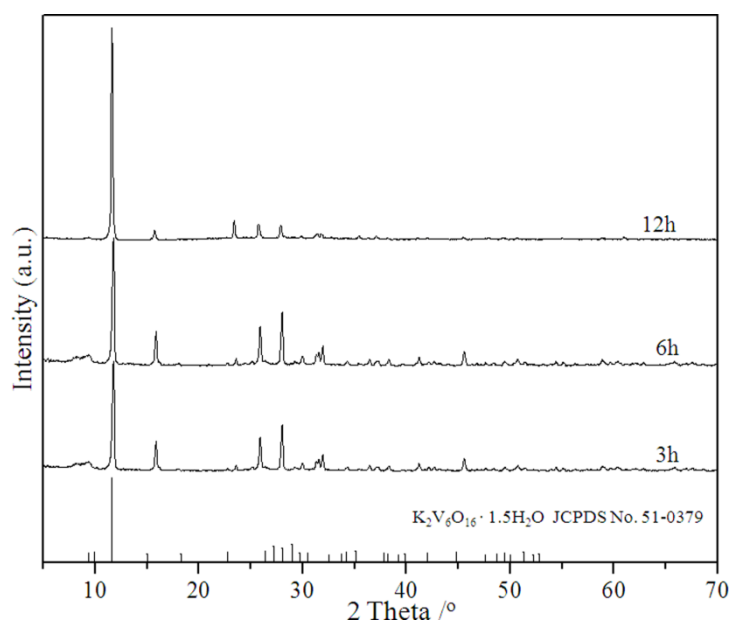

**Fig. S4** XRD patterns of samples obtained at the hydrothermal conditions of 200 °C and pH=3 for different time.

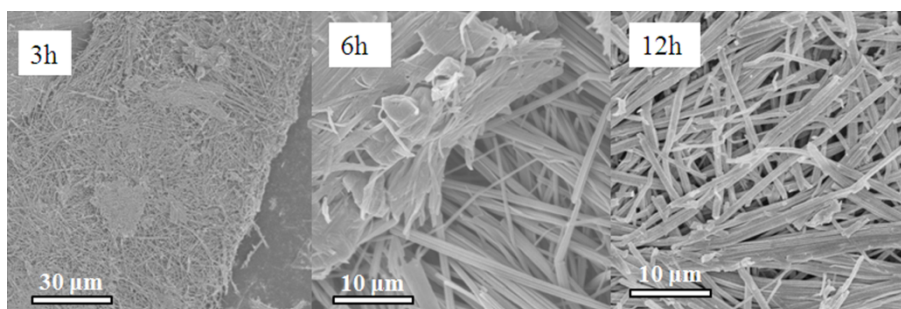

**Fig. S5** FE-SEM images of samples obtained at the hydrothermal conditions of 200 °C and pH=3 for different time.
